# Supplementary material
Source: PubMed Central journal article supplement (PMC4181359)

## Supplemental Material

### Supplemental Methods:

#### Cause of Death Ensemble Model (CODEm) methods.

Here we summarize ensemble modeling and CODEm methods; interested readers can access more detailed information about the CODEm method and ensemble modeling elsewhere.<sup>1</sup>

In brief, ensemble models combine predictions of multiple individual models. Ensemble models estimated in a variety of fields have demonstrated smaller prediction error than the best individual model. Another advantage of ensemble models is that they capture not only input parameter uncertainty, but also uncertainty stemming from model specification. In order to combine predictions from multiple models (varying in model form, outcome definition, and covariate selection), individual model results are usually weighted before averaging to produce ensemble estimates.

CODEm worked with two main model forms: linear mixed effects models and spatial-temporal models. Linear mixed effects models assumed fixed effects of covariates, and hierarchical random effects by super-region, region, country, and age. Spatial-temporal models begin with the mixed effects models, but remove the random country effect, instead calculating residuals (predicted – observed estimate) and performing local regressions on nearby data (in the dimensions of country (“space”) and time (year)). Gaussian Process Regression was used to carry forward sampling and non-sampling variance in the source data. Two types of dependent cause of death variables were used: mortality rates and “cause fraction” (e.g., proportion of IHD mortality in all-cardiovascular disease mortality or all-cause mortality). The two model forms (mixed effects linear models and spatial-temporal models) and two outcome definitions (rate and cause fraction) led to four model “families” (four combinations of form and outcome) contributing to ensemble models.

Covariates were added stepwise to models, in order of a prior literature-based assumptions about causal association and strength of association, and kept in models if the covariate showed estimated direction of association and if the multivariate covariate coefficient was significant at the <0.05 level.

Biological/physiological covariates (e.g., country mean blood pressure or cholesterol), behavioral covariates (country mean dietary consumption and physical activity level) and contextual covariates (e.g., mean education level, per capita income, and health system access) were examined.<sup>2</sup> A complete list of covariates contributing to the IHD mortality models is available elsewhere.<sup>3</sup> Multiple models were developed from combinations of covariate sets in all four model families. We decided to apply more

weight to predictions from models that performed better out-of-sample, using monotonically declining weights based on the model's performance rank.

### Supplemental References

1. Foreman KJ, Lozano R, Lopez AD, Murray CJ. Modeling causes of death: An integrated approach using codem. *Population health metrics*. 2012;10:1
2. Lozano R, Naghavi M, Foreman K, Lim S, Shibuya K, Aboyans V, Abraham J, Adair T, Aggarwal R, Ahn SY, Alvarado M, Anderson HR, Anderson LM, Andrews KG, Atkinson C, Baddour LM, Barker-Collo S, Bartels DH, Bell ML, Benjamin EJ, Bennett D, Bhalla K, Bikbov B, Bin Abdulhak A, Birbeck G, Blyth F, Bolliger I, Boufous S, Bucello C, Burch M, Burney P, Carapetis J, Chen H, Chou D, Chugh SS, Coffeng LE, Colan SD, Colquhoun S, Colson KE, Condon J, Connor MD, Cooper LT, Corriere M, Cortinovis M, de Vaccaro KC, Couser W, Cowie BC, Criqui MH, Cross M, Dabhadkar KC, Dahodwala N, De Leo D, Degenhardt L, Delossantos A, Denenberg J, Des Jarlais DC, Dharmaratne SD, Dorsey ER, Driscoll T, Duber H, Ebel B, Erwin PJ, Espindola P, Ezzati M, Feigin V, Flaxman AD, Forouzanfar MH, Fowkes FG, Franklin R, Fransen M, Freeman MK, Gabriel SE, Gakidou E, Gaspari F, Gillum RF, Gonzalez-Medina D, Halasa YA, Haring D, Harrison JE, Havmoeller R, Hay RJ, Hoen B, Hotez PJ, Hoy D, Jacobsen KH, James SL, Jasrasaria R, Jayaraman S, Johns N, Karthikeyan G, Kassebaum N, Keren A, Khoo JP, Knowlton LM, Kobusingye O, Koranteng A, Krishnamurthi R, Lipnick M, Lipshultz SE, Ohno SL, Mabweijano J, MacIntyre MF, Mallinger L, March L, Marks GB, Marks R, Matsumori A, Matzopoulos R, Mayosi BM, McAnulty JH, McDermott MM, McGrath J, Mensah GA, Merriman TR, Michaud C, Miller M, Miller TR, Mock C, Mocumbi AO, Mokdad AA, Moran A, Mulholland K, Nair MN, Naldi L, Narayan KM, Nasseri K, Norman P, O'Donnell M, Omer SB, Ortblad K, Osborne R, Ozgediz D, Pahari B, Pandian JD, Rivero AP, Padilla RP, Perez-Ruiz F, Perico N, Phillips D, Pierce K, Pope CA, 3rd, Porrini E, Pourmalek F, Raju M, Ranganathan D, Rehm JT, Rein DB, Remuzzi G, Rivara FP, Roberts T, De Leon FR, Rosenfeld LC, Rushton L, Sacco RL, Salomon JA, Sampson U, Sanman E, Schwebel DC, Segui-Gomez M, Shepard DS, Singh D, Singleton J, Sliwa K, Smith E, Steer A, Taylor JA, Thomas B, Tleyjeh IM, Towbin JA, Truelsen T, Undurraga EA, Venketasubramanian N, Vijayakumar L, Vos T, Wagner GR, Wang M, Wang W, Watt K, Weinstock MA, Weintraub R, Wilkinson JD, Woolf AD, Wulf S, Yeh PH, Yip P, Zabetian A, Zheng ZJ, Lopez AD, Murray CJ, AlMazroa MA, Memish ZA. Global and regional mortality from 235 causes of death for 20 age groups in 1990 and 2010: A systematic analysis for the global burden of disease study 2010. *Lancet*. 2012;380:2095-2128
3. Forouzanfar MH, Moran AE, Flaxman AD, Roth G, Mensah GA, Ezzati M, Naghavi M, Murray CJ. Assessing the global burden of ischemic heart disease, part 2: Analytic methods and estimates of the global epidemiology of ischemic heart disease in 2010. *Glob Heart*. 2012;7:331-342

**Supplemental Table 1: Site-years by decade and source type for the GBD 2010 Study IHD mortality analysis.**

| Source Type        | 1980-1989 | 1990-1999 | 2000-2011 |     |
|--------------------|-----------|-----------|-----------|-----|
| Surveillance       |           | 0         | 27        | 24  |
| Verbal autopsy     |           | 14        | 23        | 40  |
| Vital Registration |           | 808       | 966       | 940 |

**Supplemental Table 2: Site-years by GBD 2010 region for the IHD mortality analysis.**

| <b>GBD Super Region</b>            | <b>GBD Region</b>            | <b>Site-years of IHD mortality data</b> |
|------------------------------------|------------------------------|-----------------------------------------|
| <b>High Income</b>                 |                              |                                         |
|                                    | Asia Pacific, High Income    | <b>92</b>                               |
|                                    | Europe, Western              | <b>605</b>                              |
|                                    | Australasia                  | <b>56</b>                               |
|                                    | North America, High Income   | <b>60</b>                               |
|                                    | Latin America, Southern      | <b>87</b>                               |
| <b>Eastern Europe/Central Asia</b> |                              |                                         |
|                                    | Europe, Central              | <b>274</b>                              |
|                                    | Europe, Eastern              | <b>194</b>                              |
|                                    | Asia, Central                | <b>186</b>                              |
| <b>Latin America/Caribbean</b>     |                              |                                         |
|                                    | Latin America, Tropical      | <b>59</b>                               |
|                                    | Latin America, Central       | <b>218</b>                              |
|                                    | Latin America, Andean        | <b>56</b>                               |
|                                    | Caribbean                    | <b>409</b>                              |
| <b>East Asia/Pacific</b>           |                              |                                         |
|                                    | Asia, Southeast              | <b>144</b>                              |
|                                    | Asia, East                   | <b>71</b>                               |
|                                    | Oceania                      | <b>15</b>                               |
| <b>North Africa / Middle East</b>  |                              | <b>136</b>                              |
| <b>South Asia</b>                  |                              | <b>54</b>                               |
| <b>Sub-Saharan Africa</b>          |                              |                                         |
|                                    | Sub-Saharan Africa, Southern | <b>102</b>                              |
|                                    | Sub-Saharan Africa, East     | <b>18</b>                               |
|                                    | Sub-Saharan Africa, Central  | <b>0</b>                                |
|                                    | Sub-Saharan Africa, West     | <b>8</b>                                |

**Supplemental Table 3: Increase in IHD deaths due to allocation of specific ill-defined or “undefined-coded” deaths to IHD, and proportion of deaths coded to specific codes assigned to IHD.**

| Disease/ICD code pertinent to undefined code            | Percent increase in IHD death due to assignment of each undefined code ( 21.5% total increase) | Percent proportion of each of undefined codes assigned to IHD |
|---------------------------------------------------------|------------------------------------------------------------------------------------------------|---------------------------------------------------------------|
| Some ill-defined from R00-R99                           | 3.4%                                                                                           | 13.8%                                                         |
| Hypertension                                            | 3.1%                                                                                           | 47.2%                                                         |
| R54: Senility                                           | 2.9%                                                                                           | 20.6%                                                         |
| All cardiac conduction disorders                        | 2.4%                                                                                           | 89.9%                                                         |
| Atherosclerosis                                         | 2.4%                                                                                           | 40.0%                                                         |
| All ill-def. descriptions of heart disease              | 1.8%                                                                                           | 47.3%                                                         |
| DIC, Cardiac arrest ,Acute respiratory failure and Coma | 1.7%                                                                                           | 25.6%                                                         |
| I50: Heart failure                                      | 1.5%                                                                                           | 76.9%                                                         |
| J81: Pulmonary oedema                                   | 0.5%                                                                                           | 76.3%                                                         |
| All encephalopathy and Cerebral oedema                  | 0.5%                                                                                           | 66.8%                                                         |
| Embolism & thrombosis                                   | 0.3%                                                                                           | 40.1%                                                         |
| Cardiogenic shock and other Shock                       | 0.3%                                                                                           | 55.2%                                                         |
| All disorders of electrolyte & fluid balance            | 0.2%                                                                                           | 13.0%                                                         |
| I99:Oth. & unspec. disorders of circulatory system      | 0.2%                                                                                           | 48.2%                                                         |
| Ill-defined (result of age and sex restriction)         | 0.1%                                                                                           | 13.6%                                                         |
| Ill-defined: from M09-M99                               | 0.1%                                                                                           | 19.0%                                                         |
| Pneumonitis                                             | 0.1%                                                                                           | 2.7%                                                          |
| Ill-defined: from N39.3-N97.8                           | 0.1%                                                                                           | 21.9%                                                         |
| Renal failure                                           | 0.1%                                                                                           | 0.8%                                                          |
| Fever ,Malasia, Febrile and convulsions unknown origin  | <0.5%                                                                                          | 8.2%                                                          |
| Ill-defined: from F32-F99                               | <0.5%                                                                                          | 16.3%                                                         |
| Cardiac sign and symptom                                | <0.5%                                                                                          | 70.7%                                                         |
| Ill-defined: from D10-D36.9                             | <0.5%                                                                                          | 16.1%                                                         |
| Ill-defined: from G43-G58.9                             | <0.5%                                                                                          | 14.6%                                                         |
| Different Paralytic syndrome and palsy syndrome         | <0.5%                                                                                          | 2.2%                                                          |

|                                    |       |       |
|------------------------------------|-------|-------|
| Ill-defined: from L01-L98.9        | <0.5% | 15.9% |
| Unspecified liver disease          | <0.5% | 0.9%  |
| Ill-defined: from H00-H99          | <0.5% | 14.4% |
| Ill-defined: from K00-k14.9        | <0.5% | 17.9% |
| Ill-defined: from A00-B99          | <0.5% | 14.2% |
| Ill-defined: from Q10-Q84.9        | <0.5% | 4.7%  |
| Ill-defined: from J30-J35.9        | <0.5% | 11.2% |
| Undefined ICD code                 | <0.5% | 31.6% |
| All unspecified parasitic diseases | <0.5% | 0.1%  |

**Supplemental Table 4: Global Burden of Disease, Injuries and Risk Factors 2010 Study Region and Country List.**

| Super Region | Region | Country |
|--------------|--------|---------|
|--------------|--------|---------|

**East Asia/Pacific**

|  |                        |                            |
|--|------------------------|----------------------------|
|  | <b>Asia, East</b>      | China                      |
|  |                        | Korea, Democratic People's |
|  |                        | Republic of                |
|  |                        | Taiwan                     |
|  | <b>Asia, Southeast</b> | Cambodia                   |
|  |                        | Indonesia                  |
|  |                        | Lao People's Democratic    |
|  |                        | Republic                   |
|  |                        | Malaysia                   |
|  |                        | Maldives                   |
|  |                        | Myanmar                    |
|  |                        | Philippines                |
|  |                        | Sri Lanka                  |
|  |                        | Thailand                   |
|  |                        | Timor-Leste                |

Viet Nam

**Oceania**

Fiji

Kiribati

Marshall Islands

Micronesia, Federated States of

Papua New Guinea

Samoa

Solomon Islands

Tonga

Vanuatu

**Eastern Europe/Central Asia**

**Asia, Central**

Armenia

Azerbaijan

Georgia

Kazakhstan

Kyrgyzstan

Mongolia

Tajikistan

Turkmenistan

Uzbekistan

Albania

**Europe, Central**

Bosnia and Herzegovina

Bulgaria

Croatia

Czech Republic

Hungary

Macedonia, the Former Yugoslav

Republic of

Montenegro

Poland

Romania

Serbia  
Slovakia  
Slovenia

**Europe, Eastern**

Belarus  
Estonia  
Latvia  
Lithuania  
Moldova  
Russian Federation  
Ukraine

**High Income**

**Asia Pacific, High Income**

Brunei Darussalam  
Japan  
Korea, Republic of  
Singapore

**Australasia**

Australia  
New Zealand

**Europe, Western**

Andorra  
Austria  
Belgium  
Cyprus  
Denmark  
Finland  
France  
Germany  
Greece  
Iceland  
Ireland  
Israel  
Italy  
Luxembourg  
Malta

|  |                |
|--|----------------|
|  | Netherlands    |
|  | Norway         |
|  | Portugal       |
|  | Spain          |
|  | Sweden         |
|  | Switzerland    |
|  | United Kingdom |

**Latin America, Southern**

- Argentina
- Chile
- Uruguay

|                                       |               |
|---------------------------------------|---------------|
| <b>North America, High<br/>Income</b> | Canada        |
|                                       | United States |

**Latin America/Caribbean**

|                  |                                     |
|------------------|-------------------------------------|
| <b>Caribbean</b> | Antigua and Barbuda                 |
|                  | Bahamas                             |
|                  | Barbados                            |
|                  | Belize                              |
|                  | Cuba                                |
|                  | Dominica                            |
|                  | Dominican Republic                  |
|                  | Grenada                             |
|                  | Guyana                              |
|                  | Haiti                               |
|                  | Jamaica                             |
|                  | Saint Lucia                         |
|                  | Saint Vincent and the<br>Grenadines |
|                  | Suriname                            |
|                  | Trinidad and Tobago                 |

**Latin America, Andean**

- Bolivia
- Ecuador



Peru

**Latin America, Central**

Colombia

Costa Rica

El Salvador

Guatemala

Honduras

Mexico

Nicaragua

Panama

Venezuela

**Latin America, Tropical**

Brazil

Paraguay

---

**North Africa / Middle East**

**North Africa / Middle East**

Algeria

Bahrain

Egypt

Iran, Islamic Republic of

Iraq

Jordan

Kuwait

Lebanon

Libyan Arab Jamahiriya

Morocco

Occupied Palestinian Territory

Oman

Qatar

Saudi Arabia

Syrian Arab Republic

Tunisia

Turkey

United Arab Emirates

Yemen

## South Asia

|                    |                                                                   |
|--------------------|-------------------------------------------------------------------|
| <b>Asia, South</b> | Afghanistan<br>Bangladesh<br>Bhutan<br>India<br>Nepal<br>Pakistan |
|--------------------|-------------------------------------------------------------------|

## Sub-Saharan Africa

|                                    |                                                                                                                    |
|------------------------------------|--------------------------------------------------------------------------------------------------------------------|
| <b>Sub-Saharan Africa, Central</b> | Angola<br>Central African Republic<br>Congo<br>Congo, the Democratic Republic of the<br>Equatorial Guinea<br>Gabon |
|------------------------------------|--------------------------------------------------------------------------------------------------------------------|

### Sub-Saharan Africa, East

Burundi  
Comoros  
Djibouti  
Eritrea  
Ethiopia  
Kenya  
Madagascar  
Malawi  
Mauritius  
Mozambique  
Rwanda  
Seychelles  
Somalia  
Sudan  
Tanzania, United Republic of  
Uganda  
Zambia

### Sub-Saharan Africa, Southern

Botswana

Lesotho  
Namibia  
South Africa  
Swaziland  
Zimbabwe

**Sub-Saharan Africa, West**

Benin  
Burkina Faso  
Cameroon  
Cape Verde  
Chad  
Cote d'Ivoire  
Gambia  
Ghana  
Guinea  
Guinea-Bissau  
Liberia  
Mali  
Mauritania  
Niger  
Nigeria  
Sao Tome and Principe  
Senegal  
Sierra Leone  
Togo

---

**Supplemental Table 5: Annual IHD deaths, males and females, by region, 1980-2010, the Global Burden of Disease 2010 Study**

| <b>Year</b>                | <b>1980</b> | <b>1985</b> | <b>1990</b> | <b>1995</b> | <b>2000</b> | <b>2005</b> | <b>2010</b> |
|----------------------------|-------------|-------------|-------------|-------------|-------------|-------------|-------------|
| Asia Pacific, High Income  | 102,725     | 109,964     | 113,347     | 119,074     | 127,826     | 142,299     | 166,853     |
| Europe, Western            | 970,818     | 970,646     | 929,366     | 885,249     | 831,709     | 745,285     | 745,590     |
| Australasia                | 41,780      | 43,058      | 42,128      | 40,280      | 36,551      | 34,436      | 37,738      |
| North America, High Income | 726,848     | 739,737     | 703,057     | 685,624     | 655,069     | 613,831     | 619,377     |
| Europe, Central            | 281,482     | 309,389     | 331,497     | 346,890     | 334,231     | 340,145     | 344,139     |
| Latin America, Southern    | 55,206      | 55,958      | 56,753      | 55,837      | 60,488      | 61,990      | 65,106      |
| Europe, Eastern            | 741,533     | 800,386     | 834,783     | 1,079,003   | 1,125,919   | 1,219,386   | 1,115,213   |
| Asia, East                 | 359,016     | 416,822     | 472,158     | 604,981     | 787,789     | 873,827     | 992,163     |
| Latin America, Tropical    | 94,861      | 106,649     | 111,338     | 125,006     | 134,071     | 146,546     | 166,596     |
| Latin America, Central     | 68,099      | 75,836      | 91,521      | 106,884     | 121,056     | 137,658     | 166,532     |
| Asia, Southeast            | 140,306     | 166,005     | 215,719     | 262,910     | 292,138     | 325,325     | 383,323     |
| Asia, Central              | 119,401     | 125,561     | 138,157     | 168,986     | 167,981     | 179,638     | 184,167     |
| Latin America, Andean      | 11,409      | 13,599      | 15,575      | 16,870      | 19,425      | 21,917      | 24,350      |
| North Africa / Middle East | 205,187     | 226,276     | 263,978     | 307,579     | 336,802     | 371,325     | 418,019     |
| Caribbean                  | 29,407      | 34,962      | 40,315      | 46,384      | 47,019      | 49,183      | 54,576      |
| Asia, South                | 433,832     | 500,273     | 704,833     | 915,207     | 1,090,272   | 1,186,987   | 1,323,551   |

|                                 |        |        |        |        |        |        |        |
|---------------------------------|--------|--------|--------|--------|--------|--------|--------|
| Oceania                         | 1,604  | 1,980  | 2,552  | 3,027  | 3,377  | 3,949  | 4,581  |
| Sub-Saharan Africa,<br>Southern | 16,883 | 18,131 | 20,094 | 22,420 | 22,275 | 22,721 | 24,103 |
| Sub-Saharan Africa,<br>East     | 42,241 | 47,965 | 54,706 | 59,459 | 60,780 | 66,701 | 75,673 |
| Sub-Saharan Africa,<br>Central  | 15,508 | 17,923 | 20,272 | 22,699 | 24,269 | 27,481 | 33,306 |
| Sub-Saharan Africa,<br>West     | 37,140 | 42,668 | 49,641 | 56,603 | 66,515 | 72,152 | 84,315 |

**Supplemental Table 6: Years of life lost (YLL) due to IHD, males and females, by region, 1980-2010, the Global Burden of Disease 2010 Study**

| <b>Year</b>                | <b>1980</b> | <b>1985</b> | <b>1990</b> | <b>1995</b> | <b>2000</b> | <b>2005</b> | <b>2010</b> |
|----------------------------|-------------|-------------|-------------|-------------|-------------|-------------|-------------|
| Asia Pacific, High Income  | 1,878,938   | 1,917,315   | 1,798,146   | 1,737,100   | 1,762,044   | 1,812,636   | 1,920,451   |
| Europe, Western            | 14,926,890  | 14,170,528  | 12,860,688  | 11,636,179  | 10,352,545  | 8,807,634   | 8,428,017   |
| Australasia                | 702,407     | 676,014     | 615,515     | 542,832     | 461,622     | 405,899     | 419,557     |
| North America, High Income | 11,282,204  | 10,796,930  | 9,769,603   | 9,285,417   | 8,665,142   | 8,060,007   | 7,825,615   |
| Europe, Central            | 4,825,839   | 5,233,820   | 5,597,369   | 5,724,146   | 5,306,431   | 5,089,778   | 4,835,548   |
| Latin America, Southern    | 1,045,640   | 984,106     | 952,977     | 918,531     | 965,586     | 933,315     | 945,652     |
| Europe, Eastern            | 12,195,199  | 12,864,701  | 13,363,422  | 19,080,796  | 19,691,217  | 21,395,103  | 17,671,525  |
| Asia, East                 | 7,514,092   | 8,485,632   | 9,449,260   | 11,905,005  | 14,940,087  | 15,493,412  | 16,795,598  |
| Latin America, Tropical    | 2,148,570   | 2,308,880   | 2,341,808   | 2,542,240   | 2,669,026   | 2,779,536   | 3,015,732   |
| Latin America, Central     | 1,440,409   | 1,546,425   | 1,762,410   | 2,025,428   | 2,188,620   | 2,366,529   | 2,827,557   |
| Asia, Southeast            | 3,194,862   | 3,774,990   | 4,818,933   | 5,720,044   | 6,153,507   | 6,704,804   | 7,765,379   |
| Asia, Central              | 2,038,453   | 2,110,414   | 2,434,441   | 3,126,687   | 3,140,725   | 3,358,046   | 3,344,003   |
| Latin America, Andean      | 244,027     | 283,086     | 312,129     | 328,017     | 386,016     | 426,970     | 437,785     |
| North Africa / Middle East | 5,254,483   | 5,639,548   | 6,521,855   | 7,338,169   | 7,613,176   | 7,995,777   | 8,822,768   |
| Caribbean                  | 561,395     | 639,033     | 694,309     | 741,590     | 737,508     | 759,499     | 839,991     |
| Asia, South                | 10,961,439  | 12,583,981  | 17,300,420  | 21,750,749  | 25,316,742  | 27,628,587  | 29,759,902  |

|                                 |            |            |            |             |             |             |             |
|---------------------------------|------------|------------|------------|-------------|-------------|-------------|-------------|
| Oceania                         | 45,732     | 55,796     | 71,723     | 85,162      | 93,788      | 107,351     | 122,337     |
| Sub-Saharan<br>Africa, Southern | 380,082    | 402,485    | 439,982    | 501,979     | 525,788     | 531,476     | 514,823     |
| Sub-Saharan<br>Africa, East     | 1,095,487  | 1,239,823  | 1,414,599  | 1,551,138   | 1,554,534   | 1,628,544   | 1,781,311   |
| Sub-Saharan<br>Africa, Central  | 395,017    | 450,581    | 508,418    | 560,763     | 597,068     | 666,283     | 805,163     |
| Sub-Saharan<br>Africa, West     | 1,138,204  | 1,293,544  | 1,492,723  | 1,723,077   | 1,858,139   | 1,890,019   | 2,146,457   |
| Totals                          | 83,269,368 | 87,457,630 | 94,520,731 | 108,825,050 | 114,979,311 | 118,841,204 | 121,025,168 |

Supplemental Figure 1a. Males: Crude Ischemic Heart Disease Mortality Rate per 100,000 persons by Super Region and Globally, 1980-2010, the Global Burden of Disease 2010 Study.

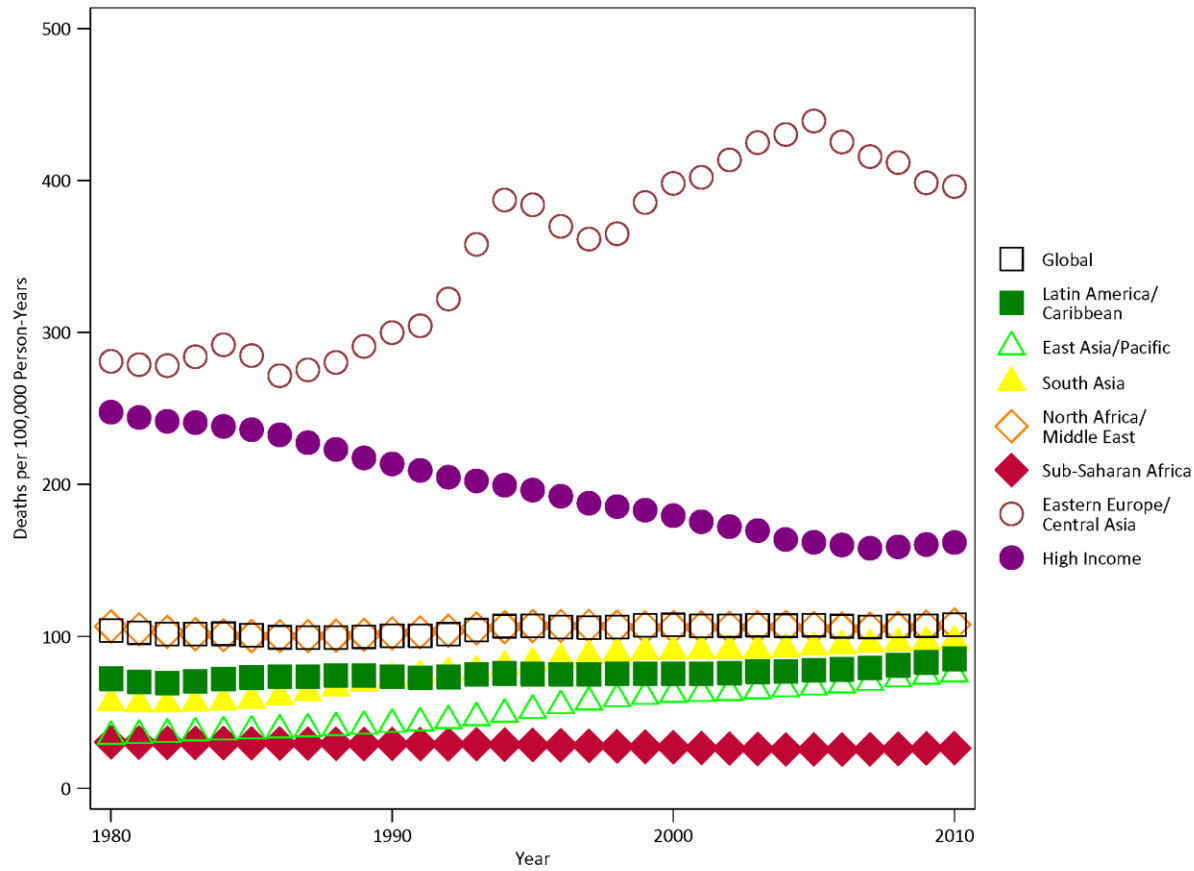



**Supplemental Figure 1b. Females: Crude Ischemic Heart Disease Mortality Rate per 100,000 persons by Super Region and Globally, 1980-2010, the Global Burden of Disease 2010 Study.**

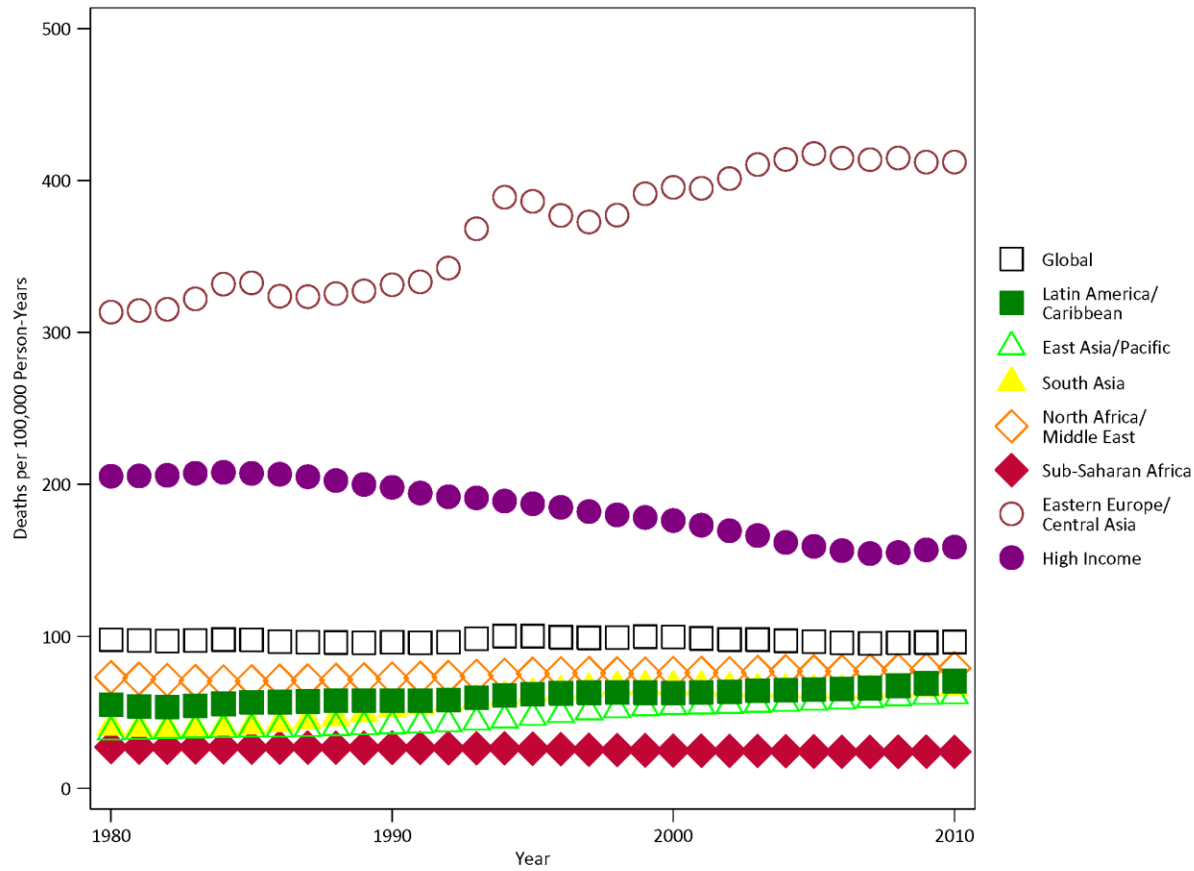

Supplement: NIHMS625986-supplement-01.pdf [file NIHMS625986-supplement-01.pdf]
